CORRECTION

## Correction: *WormSNAP*: A software for fast, accurate, and unbiased detection of fluorescent puncta in *C. elegans*

Araven Tiroumalechetty, Elisa B. Frankel, Peri T. Kurshan

In the Fluorescent puncta detection in *C. elegans* research subsection of the Introduction, a reference is omitted from the seventh sentence of the third paragraph.

The correct sentence is: Although some progress has been made in switching to automated identification of 2D regions of interest (ROIs) to retain spatial information [7,12] [Hulsey-Vincent et al., 2023], no widely adopted method yet exists in this subfield.

The reference is: Hulsey-Vincent H, Alvinez N, Witus S, Kowalski JR, Dahlberg C. 2023. A Fiji process for quantifying fluorescent puncta in linear cellular structures. microPublication Biology. <https://doi.org/10.17912/micropub.biology.001003>.

### Reference

1. Tiroumalechetty A, Frankel EB, Kurshan PT. *WormSNAP*: A software for fast, accurate, and unbiased detection of fluorescent puncta in *C. elegans*. PLoS Comput Biol. 2025;21(10):e1013643. <https://doi.org/10.1371/journal.pcbi.1013643> PMID: [41171895](https://pubmed.ncbi.nlm.nih.gov/41171895/)

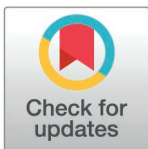

### OPEN ACCESS

**Citation:** Tiroumalechetty A, Frankel EB, Kurshan PT (2026) Correction: *WormSNAP*: A software for fast, accurate, and unbiased detection of fluorescent puncta in *C. elegans*. PLoS Comput Biol 22(2): e1013953. <https://doi.org/10.1371/journal.pcbi.1013953>

**Published:** February 10, 2026

**Copyright:** © 2026 Tiroumalechetty et al. This is an open access article distributed under the terms of the [Creative Commons Attribution License](https://creativecommons.org/licenses/by/4.0/), which permits unrestricted use, distribution, and reproduction in any medium, provided the original author and source are credited.
